# Supplementary material
Source: PubMed Central journal article supplement (PMC3989205)
Supplement: NIHMS569446-supplement-01.pdf [file NIHMS569446-supplement-01.pdf]

1 **Supplemental Figures**

2

3 **Figure S1, related to Figure 3.** Impact of MCK2 on MCMV dissemination to the salivary  
4 glands and PM levels in blood. Viral titers in salivary glands at 14 dpi shown as mean values  $\pm$   
5 SE where horizontal line represent assay threshold. \* $p < 0.05$ ; n.s., not significant ( $p > 0.05$ ) for  
6 groups of 5 mice.

7

8 **Figure S2, related to Figure 3.** Infection of macrophages independent of MCK2 function.  
9 Bone-marrow derived macrophages (BMDM) and immortalized J774 macrophage-like cells  
10 were infected with MCK2-expressing rescue virus RQ461 (MCK2+) or MCK2-deficient virus  
11 RM461 (MCK2mut) at an m.o.i. of 0.5, 1 or 5. Viral stock titers were determined on NIH3T3  
12 cells, a fibroblast cell type where both viruses replicate as well as parental K181 strain MCMV  
13 (Saederup et al., 1999; Saederup et al., 2001). Assessment of IE1 frequency  $\pm$  SE was performed  
14 at 18 hpi in eight replicate wells of a 24-well dish.

15

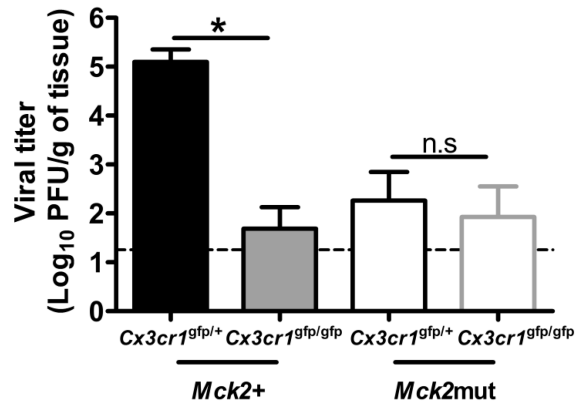

15

16 Supplemental Fig 1

17

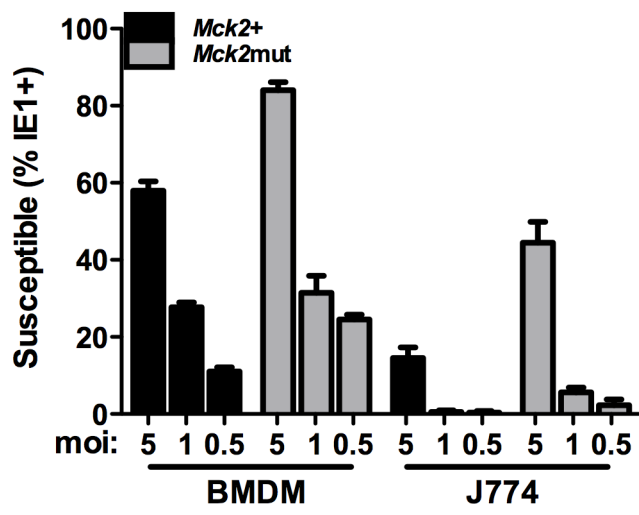

17

18 Supplemental Fig 2
